# Supplementary material for: ONECUT2 upregulation is associated with CpG hypomethylation at promoter‐proximal DNA in gastric cancer and triggers ACSL5
Source: PubMed Central journal article supplement — Int J Cancer. 2020 Mar 20;146(12):3354–68. doi: 10.1002/ijc.32946 (PMC7217064; doi:10.1002/ijc.32946), 2020-03-20
Supplement: IJC-146-3354-s001.pdf [file IJC-146-3354-s001.pdf]

Supplementary Information

***ONECUT2* upregulation is associated with CpG hypomethylation at promoter-proximal DNA in gastric cancer and triggers *ACSL5***

Eun-Hye Seo, Hee-Jin Kim, Jong-Hwan Kim, Byungho Lim, Jong-Lyul Park, Seon-Young Kim, Sang-Il Lee, Hyun-Yong Jeong, Kyu-Sang Song, Yong Sung Kim

**Table of contents**

1. Supplementary Material and Methods
2. Supplementary Tables
3. Supplementary Figures
4. Supplementary References

## **Supplementary Materials and Methods**

### **Statistical analysis**

A paired *t*-test was used to examine differences in mRNA level and methylation between paired gastric tumor and adjacent non-tumor tissues. Values are expressed as the mean  $\pm$  standard deviation (SD). All data are representative of at least three separate experiments, and the results are expressed as the group mean  $\pm$  SD. Correlations between OC2 expression and CpG methylation or between the levels of two different genes were determined using Pearson's correlation coefficient. All statistical analyses were performed using the R package.

## Supplementary Tables

**Table S1.** Origin and characteristics of gastric cancer cell lines

|                            | SNU1                     | SNU5                     | SNU16                    | SNU216                       | SNU484                     | SNU520                     | SNU601                           | SNU620                        | SNU638                        | SNU668                           | SNU719                       | MKN1                              | MKN45                        | MKN74                        | AGS                                                    | KATOIII                          |
|----------------------------|--------------------------|--------------------------|--------------------------|------------------------------|----------------------------|----------------------------|----------------------------------|-------------------------------|-------------------------------|----------------------------------|------------------------------|-----------------------------------|------------------------------|------------------------------|--------------------------------------------------------|----------------------------------|
| Origin                     | stomach                  | stomach;<br>ascites      | stomach;<br>ascites      | stomach;<br>lymph node       | stomach                    | stomach                    | stomach;<br>ascites              | stomach;<br>ascites           | stomach;<br>ascites           | stomach;<br>ascites              | stomach                      | stomach; lymph<br>node metastasis | stomach; liver<br>metastasis | stomach; liver<br>metastasis | stomach                                                | stomach;<br>pleural<br>effusion  |
| Species (age)              | human                    | female (33)<br>Mongoloid | female (33)<br>Mongoloid | female (46)<br>Mongoloid     | male (53)<br>Mongoloid     | female (60)<br>Mongoloid   | male (34)<br>Mongoloid           | female (59)<br>Mongoloid      | male (48)<br>Mongoloid        | male (63)<br>Mongoloid           | male (53)<br>Mongoloid       | male (72)<br>Mongoloid            | female (62)<br>Mongoloid     | male (37)<br>Mongoloid       | female (54)<br>Caucasian                               | male (55)<br>Mongoloid           |
| Growth<br>pattern          | suspension               | suspension               | suspension               | monolayer                    | monolayer                  | suspension                 | monolayer                        | suspension                    | monolayer                     | monolayer                        | monolayer                    | monolayer                         |                              | monolayer                    | monolayer                                              | adherent<br>and<br>suspension    |
| Histo-<br>pathology        | adenocarcinoma           | adenocarcinoma           | adenocarcinoma           | adenocarcinoma               | adenocarcinoma,<br>primary | adenocarcinoma,<br>primary | signet ring<br>cell<br>carcinoma | adenocarcinoma,<br>metastatic | adenocarcinoma,<br>metastatic | signet ring<br>cell<br>carcinoma | adenocarcinoma,<br>primary   | carcinoma,<br>adenosquamous       | adenocarcinoma               | adenocarcinoma,<br>tubular   | adenocarcinoma                                         | signet ring<br>cell<br>carcinoma |
| Differentiation            | poorly<br>differentiated | poorly<br>differentiated | poorly<br>differentiated | moderately<br>differentiated | poorly<br>differentiated   | poorly<br>differentiated   | poorly<br>differentiated         | poorly<br>differentiated      | poorly<br>differentiated      | poorly<br>differentiated         | moderately<br>differentiated |                                   | poorly<br>differentiated     | well-<br>differentiated      | well-<br>differentiated to<br>poorly<br>differentiated | poorly<br>differentiated         |
| Lauren's<br>classification |                          |                          |                          | intestinal                   |                            | diffuse                    | diffuse                          | diffuse                       |                               | diffuse                          | intestinal                   | -                                 | diffuse                      | intestinal                   | mixed                                                  | diffuse                          |
| Reference*                 | 1, 2                     | 1, 2                     | 1, 2                     | 1, 3                         | 1, 3                       | 1, 3                       | 1, 3,                            | 1, 3                          | 1, 3                          | 1, 3                             | 1, 3                         | 1, 4                              | 1, 4                         | 1, 4                         | 1, 5                                                   | 1, 4                             |

\*1. Korean Cell Line Bank; 2. Park et al. (1990); 3. Park et al. (1997); 4. Yokozaki (2000); 5. Barranco et al. (1983)

**Table S2.** Primer sequences used in this study

| Primer                                     | Sequence(s)                               | $T_m$<br>(°C) | Cycle<br>s | Product<br>(bp) |
|--------------------------------------------|-------------------------------------------|---------------|------------|-----------------|
| <i>(a) For RT-PCR and qRT-PCR</i>          |                                           |               |            |                 |
| OC2                                        | F: 5'-AAATCTGGCAGGGAGACCTT-3'             | 64            | 39         | 151             |
|                                            | R: 5'-CTGCTGGGAAATGGTGATCT-3'             |               |            |                 |
| $\beta$ -actin                             | F: 5'-CAAGAGATGGCCACGGCTGCT-3'            | 68            | 25         | 283             |
|                                            | R: 5'-TCCTTCTGCATCCTGTGCGCA-3'            |               |            |                 |
| <i>(b) For bisulfite sequencing of OC2</i> |                                           |               |            |                 |
| Region 1                                   | F: 5'-GTAGTTTGGGGTGTATATTTGTAT-3'         | 62            | 35         | 159             |
|                                            | R: 5'-CAACCTTCATTCAATCCATCAAAA-3'         |               |            |                 |
| Region 2                                   | F: 5'-GGGTATTTTTTTGTAGGGATTGTAGAG-3'      | 62            | 35         | 477             |
|                                            | R: 5'-AAACTACTAACCAACCCCAACCC-3'          |               |            |                 |
| <i>(c) For pyrosequencing</i>              |                                           |               |            |                 |
| OC2-pyro-F                                 | 5'-GAGGGTGGTGAATTTGTTAGA-3'               | 59            | 40         | 199             |
| OC2-pyro-R                                 | 5'-ACCATAATCACCAACATAACCTC-3'             |               |            |                 |
| OC2-pyro-S                                 | 5'-TTGTTTATGTTTATGTTAGG-3'                |               |            |                 |
| <i>(d) For cloning of OC2 gene</i>         |                                           |               |            |                 |
| XbaI-OC2-F                                 | 5'-GTATCTAGAGCCACCATGAAGGCTGCCTACACCGC-3' |               |            |                 |
| NotI-OC2-R                                 | 5'-GTCGCGGCCGCTCATGCTTTGGTACACGTGCTG-3'   |               |            |                 |
| <i>(e) For ChIP-PCR</i>                    |                                           |               |            |                 |
| Region 1                                   | 5'-CCTCCACAGCCACTGGTAG-3'                 | 60            | 35         | 184             |
|                                            | 5'-GACGTCTTCTGTTTGGGTGAG-3'               |               |            |                 |
| Region 2                                   | 5'-CAGCATGGCCTCGATCCT-3'                  | 60            | 35         | 187             |
|                                            | 5'-AGGGTGGTGGAACTTGTCAG-3'                |               |            |                 |
| Region 3                                   | 5'-GCCAGCTGGAAGAAATCAAC-3'                | 60            | 35         | 177             |
|                                            | 5'-TCTCCCTGCCAGATTTGAGT-3'                |               |            |                 |

**Table S3.** OC2 peaks significantly increased over 4-fold at the promoter region in OC2-transfected AGS cells compared with the control (MS Excel file)

**Table S4.** OC2 peaks significantly increased over 4-fold at the promoter region of OC2-transfected MKN74 cells compared with the control (MS Excel file)

**Table S5.** Genes significantly upregulated in OC2-transfected AGS cells compared with the control (MS Excel file)

**Table S6.** Genes significantly upregulated in OC2-transfected MKN74 cells compared with the control (MS Excel file)

## Supplementary Figures

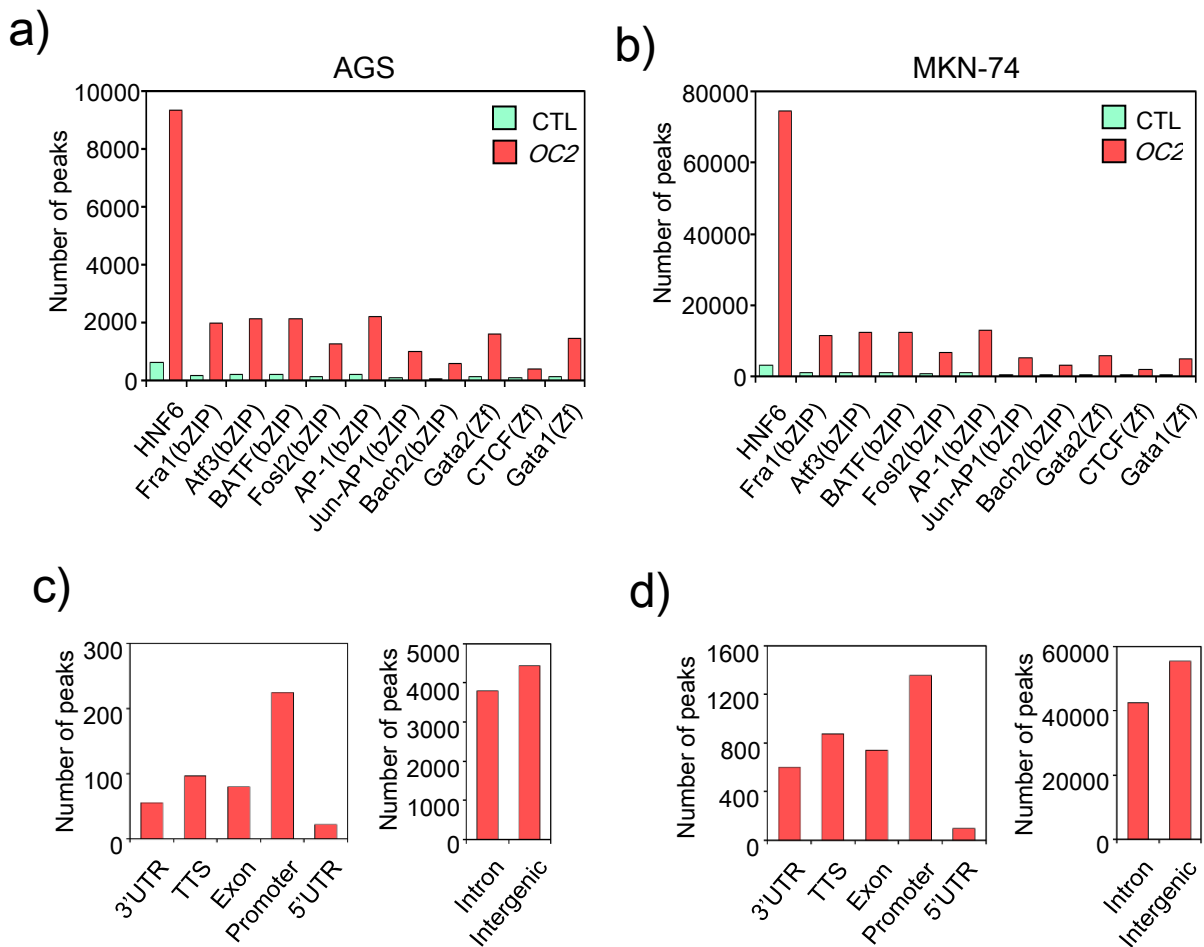

**Figure S1.** OC2-binding motif as determined with ChIP-seq analysis. (a) Top OC2-binding motifs in OC2-AGS cells. The consensus motif with the highest enrichment of an individual OC2-binding site was *HNF6* with 9,336 peaks of total OC2 peaks in OC2-AGS cells ( $p = 1e-7601$ ) and 652 peaks in control cells ( $p = 1e-50$ ). (b) Top OC2-binding motifs in OC2-MKN-74 cells. The consensus motif with the highest enrichment of an individual OC2-binding site was also *HNF6* with 74,543 peaks of total OC2 peaks in OC2-MKN-74 cells ( $p = 1e-54622$ ) and 3,023 peaks in control cells ( $p = 1e-1678$ ). (c, d) Distribution of OC2-binding motifs based on genomic features in OC2-AGS (c) and OC2-MKN74 (d) cells significantly increased following transfection of cells with OC2: 224 peaks in OC2-AGC cells (Supplementary Table S3) and 1353 peaks in OC2-MKN-74 cells (Supplementary Table S4) were significantly increased by  $\geq 4$ -fold compared with the control-transfected cells, respectively ( $p < 0.0001$ ).

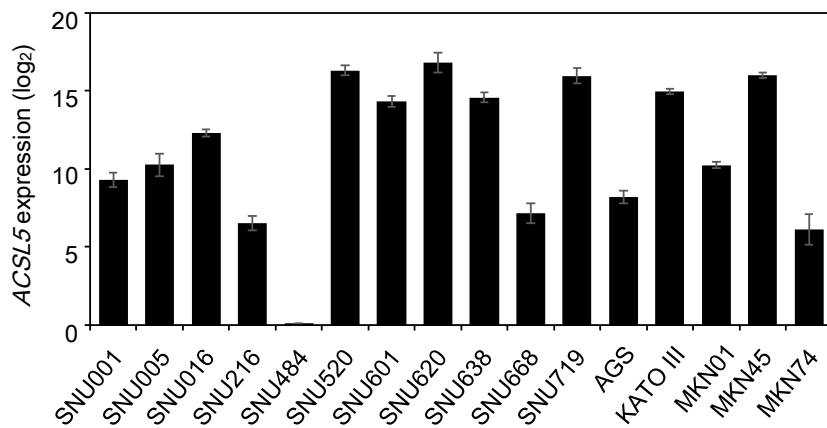

**Figure S2.** qRT-PCR analysis for *ACSL5* expression in GC cell lines. This analysis was performed to select *ACSL5*-expressed GC cell for KD experiment by siRNA. Actually, MKN01 was selected and treated with siRNAs in this study.

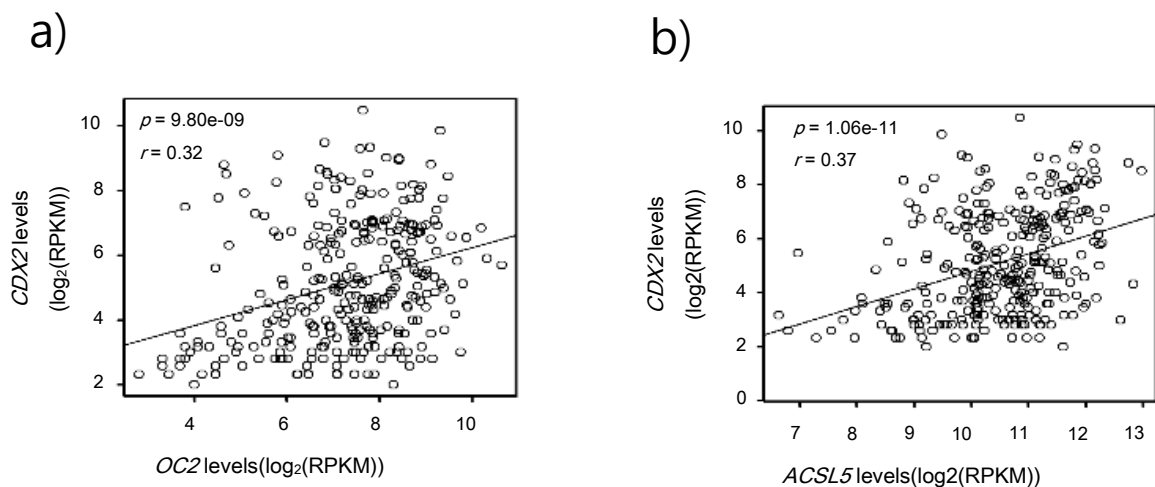

**Figure S3.** Positive correlation between *CDX2* and *OC2* (a) or *ACSL5* (b) based on data from 311 GC tissues in the GENT database. This data suggests that three IM markers, such as *CDX2*, *OC2*, and *ACSL5*, may be associated with intestinal differentiation or development of IGC.

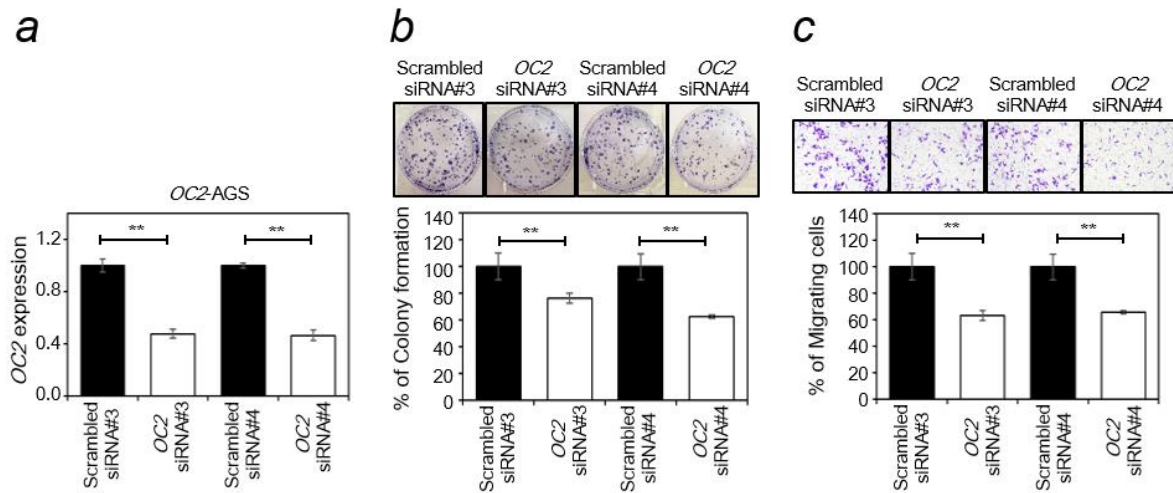

**Figure S4.** The loss of function of OC2 in ectopic OC2 expression cells (OC2-AGS). (a) Knockdown of OC2 by siRNA. OC2-AGS cells were transfected with two different OC2-specific or scrambled siRNAs, and OC2 mRNA level was examined by qRT-PCR. (b, c) Colony formation and migration assays for OC2-KD OC2-AGS cells. All assays were performed as described in Fig. 6*h* and 6*i*. Potential of colony forming and migration in siRNA KD cells were compared with cells transfected with scrambled siRNAs.



## Supplementary References

1. Korean Cell Line Bank (<http://cellbank.snu.ac.kr/main/index.html>)
2. Park JG, Frucht H, LaRocca RV, Bliss DP Jr, Kurita Y, Chen TR, Henslee JG, Trepel JB, Jensen RT, Johnson BE, Bang YJ, Kim JP, Gazdar AF. Characteristics of cell lines established from human gastric carcinoma. *Cancer Res.* 1990;50:2773-80.
3. Park JG, Yang HK, Kim WH, Chung JK, Kang MS, Lee JH, Oh JH, Park HS, Yeo KS, Kang SH, Song SY, Kang YK, Bang YJ, Kim YH, Kim JP. Establishment and characterization of human gastric carcinoma cell lines. *Int J Cancer.* 1997;70(4):443-9.
4. Yokozaki H. Molecular characteristics of eight gastric cancer cell lines established in Japan. *Pathol Int.* 2000;50:767-77.
5. Barranco SC, Townsend CM Jr, Casartelli C, Macik BG, Burger NL, Boerwinkle WR, Gourley WK. Establishment and characterization of an in vitro model system for human adenocarcinoma of the stomach. *Cancer Res.* 1983;43:1703-9.
